# Supplementary material for: The auditory cortex hosts network nodes influential for emotion processing: An fMRI study on music-evoked fear and joy
Source: PubMed Central journal article supplement (PMC5791961; doi:10.1371/journal.pone.0190057), 2018-01-31
Supplement: pone.0190057.s001.pdf [file pone.0190057.s001.pdf]

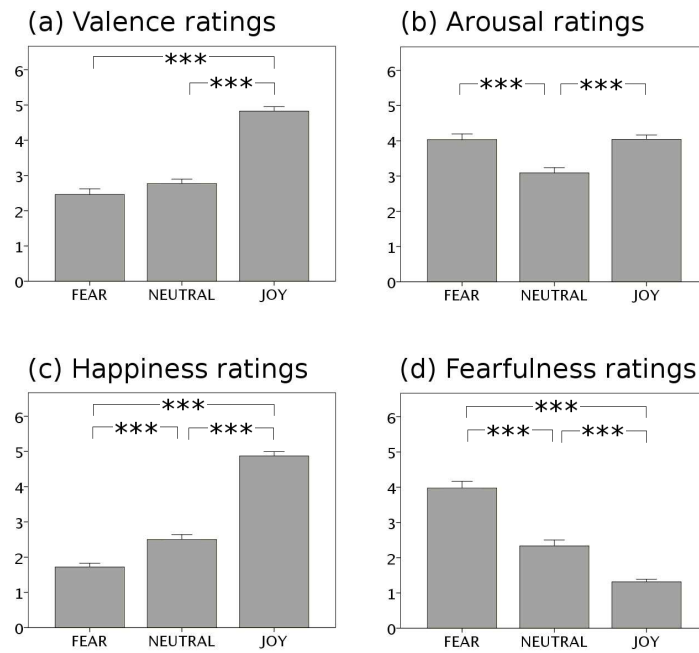

**S1 Fig. Behavioral ratings.** Behavioral ratings provided by participants on the four emotion scales used in the present study: (a) valence, (b) arousal, (c) joy, and (d) fear. Ratings are depicted separately for each stimulus category (fear, neutral, joy).
