# Supplementary material for: The auditory cortex hosts network nodes influential for emotion processing: An fMRI study on music-evoked fear and joy
Source: PubMed Central journal article supplement (PMC5791961; doi:10.1371/journal.pone.0190057), 2018-01-31
Supplement: pone.0190057.s004.pdf [file pone.0190057.s004.pdf]

| Composer                  | Title                                             | ASIN                 |
|---------------------------|---------------------------------------------------|----------------------|
| <i>Joy-evoking</i>        |                                                   |                      |
| J.S. Bach                 | Bourree (Overture No. 1, BWV 1066)                |                      |
| Anonymous                 | Entree-Courante                                   | CD-ASIN B0000247QD   |
| N. Paganini               | Violin Concerto Nr 1, 3rd movement                |                      |
| Louis Armstrong           | St. Louis Blues                                   | CD.ASIN B000FBG0HG   |
| J. Pastorius              | Soul intro ("The Chicken,"                        | CD-ASIN: B0000C24JN) |
| New Celtic Dimension      | The Lucky Penny                                   | CD-ASIN B000003NHN   |
| F. Canaro                 | La Punalada                                       | CD-ASIN: B00000DXZQ  |
| anonymus                  | Irish Jig                                         |                      |
| <i>Fear-evoking</i>       |                                                   |                      |
| Akihiko Matsumoto et al.  | Freezer Burn (from: Resident Evil Outbreak)       | B00019257G           |
| Danny Elfman              | The Killing                                       | B00000JC9R           |
| Michael Giacchino         | Monsters Are Such Interesting People (from: Lost) | B000EHSVDM           |
| Michael Giacchino         | Just Another Day on the Beach (from: Lost)        | B000I2IQ9M           |
| Michael Giacchino         | Charlie's Dream (from: Lost)                      | B000I2IQ9M           |
| Takeshi Miura et al.      | Pulsating Right Arm (from: Biohazard Code)        | B00005HWMB           |
| Seiko Kobuchi             | Boss Battle (from: Biohazard Zero)                | n/a                  |
| Masami Ueda & Saori Maeda | Cold Sweat (from: Biohazard 3)                    | B000058A7Y           |

**S1 Table. List of stimuli.**
