# Supplementary material for: The auditory cortex hosts network nodes influential for emotion processing: An fMRI study on music-evoked fear and joy
Source: PubMed Central journal article supplement (PMC5791961; doi:10.1371/journal.pone.0190057), 2018-01-31
Supplement: pone.0190057.s005.pdf [file pone.0190057.s005.pdf]

| Seed region                  | Functionally connected structures | MNI coord.  | cluster size (mm <sup>3</sup> ) | z-value: max (mean) |
|------------------------------|-----------------------------------|-------------|---------------------------------|---------------------|
| l pregenual cingulate cortex |                                   |             |                                 |                     |
|                              | precuneus                         | 0 -54 58    | 14931                           | 4.79 (3.49)         |
|                              | l postcentral g.                  | -51 -16 55  | 3159                            | 5.23 (3.57)         |
|                              | r postcentral g.                  | 60 -18 37   | 1863                            | 4.71 (3.54)         |
|                              | l p.t.                            | -54 -33 19  | 945                             | 4.17 (3.44)         |
|                              | r fusiform g.                     | 33 -42 -23  | 2187                            | 4.07 (3.43)         |
|                              | r calcarine s.                    | 3 -72 10    | 45495                           | 5.14 (3.58)         |
|                              | l occipital g.                    | -42 -81 13  | 378                             | 4.18 (3.44)         |
|                              | l cerebellum                      | -24 -51 -44 | 675                             | 3.84 (3.41)         |
| Paracentral lobule           |                                   |             |                                 |                     |
|                              | MCC                               | -8 3 40     | 1620                            | -4.17 (-3.42)       |
|                              | precuneus                         | 6 -54 73    | 594                             | -4.06 (-3.46)       |
|                              | cuneus                            | 3 -78 37    | 54081                           | -5.29 (-3.58)       |
|                              | r cerebellum                      | 15 -81 -29  | 567                             | -3.87 (-3.27)       |

PPI results with seeds in the anterior cingulate cortex and in the paracentral lobule (corrected for multiple comparisons,  $p < .001$ ). Positive z-values indicate stronger functional connectivity between a seed region and a functionally connected structure during the joy (compared to the fear) condition, negative z-values indicate stronger functional connectivity between a seed region and a functionally connected structure during the fear (compared to the joy) condition. Abbreviations: g.: gyrus; l: left; MCC: middle cingulate cortex; p.t.: planum temporale; r: right; s.: sulcus.

**S2 Table. PPI results for non-auditory seed regions.**
